# Supplementary material for: Overexpression of AtTTP Affects ARF17 Expression and Leads to Male Sterility in Arabidopsis
Source: PubMed Central journal article supplement (PMC4378849; doi:10.1371/journal.pone.0117317), 2015-03-30
Supplement: pone.0117317.s001.pdf [file pone.0117317.s001.pdf]

**Figure A**

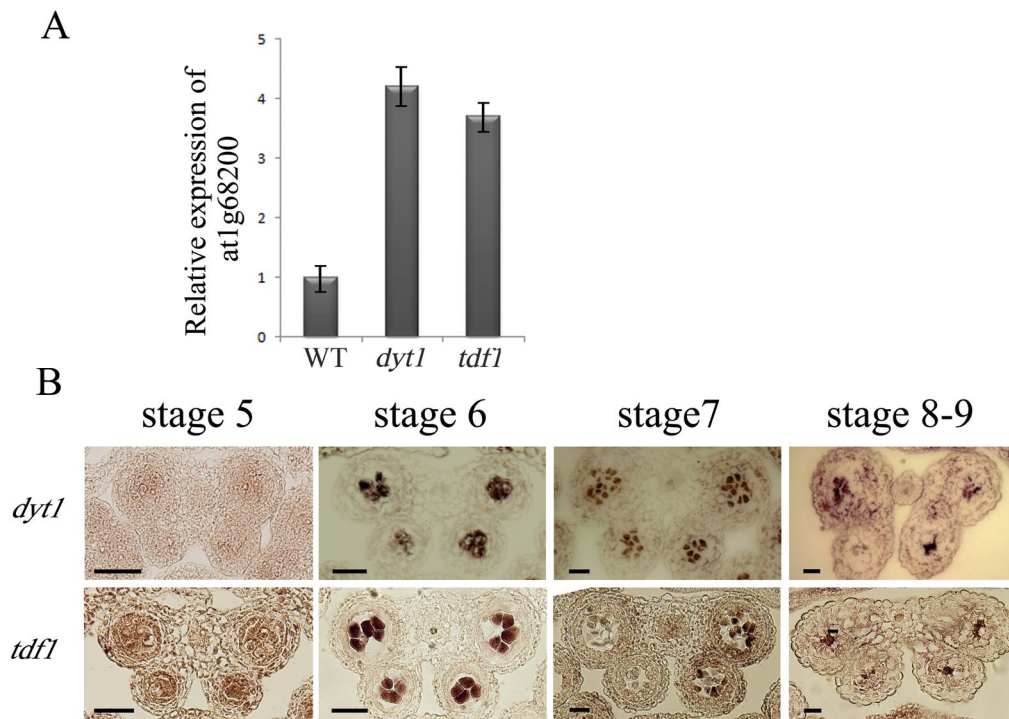

(A) Real-time PCR analysis of *AtTTP* in *dyt1* and *tdf1* floral buds. Each expression level was normalized to that of *TUBULIN*.

(B) *In situ* hybridization of the *AtTTP* transcript in the *dyt1* and *tdf1* anther.

Bars = 10  $\mu$ m

**Figure B**

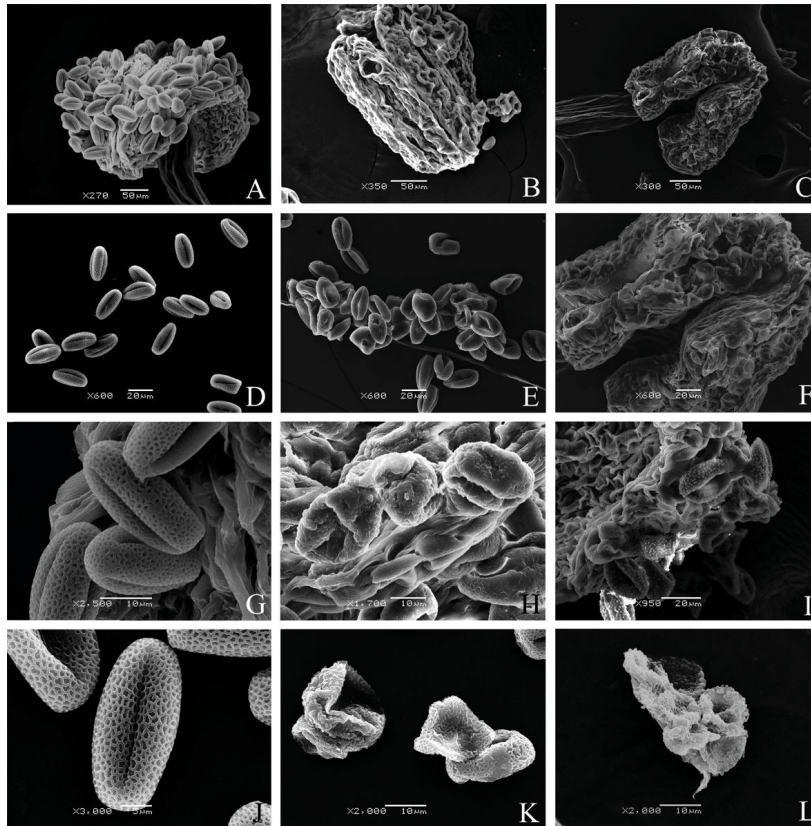

(A, B and C) Dehiscent anthers. Wild-type anther contained numerous pollen grains, whereas most of the *AtTTP*-OE pollen grains were degenerated and adhered to the anther.

(D, E and F) Pollen grains. Wild-type pollen grains were separated from each other, whereas *AtTTP*-OE pollen grains adhered to each other (E) and even were inseparable from the anther (F).

(G, H and I) Pollen grains on the dehiscent anther.

(J, K and L) Pollen exine pattern. Wild-type pollen grains have a regular reticulate exine pattern, whereas ruptured *AtTTP*-OE pollen grains exhibit a spotted exine pattern.

**Figure C**

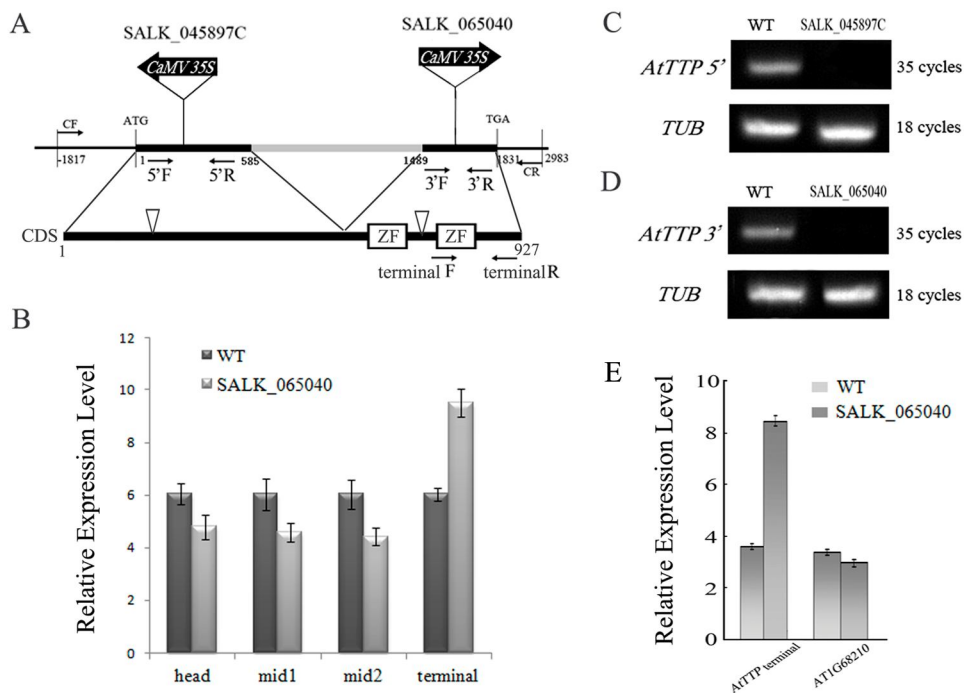

A, the T-DNA insertion of SALK\_045897 and the name of primers used in the expression analysis of *AtTTP* gene.

B, the expression analysis of different part of *AtTTP* gene in SALK\_065040. Head, the 109<sup>th</sup> to 356<sup>th</sup> bp of *AtTTP* CDS sequence. Mid1, the 551<sup>st</sup> to 740<sup>th</sup> bp of *AtTTP* CDS sequence. Mid2, the 436<sup>th</sup> to 615<sup>th</sup> bp of *AtTTP* CDS sequence.

C, the expression analysis of *AtTTP* gene in both wild type and SALK\_045897.

D, the expression analysis of C-terminal of *AtTTP* gene in both wild type and Salk\_065040.

E, the C-terminal over-expression of *AtTTP* and *At1g68210* in wild type and Salk\_065040.

**Figure D**

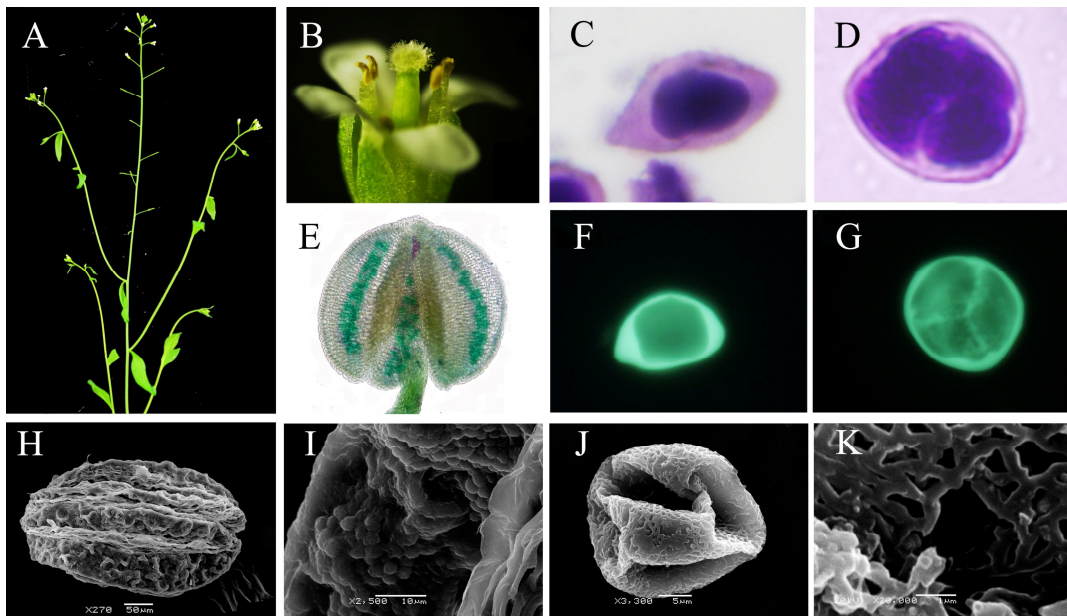

A, Salk\_065040 showed male sterility.

B, the flower of Salk\_065040

C and D, the pollen mother cells and tetrads of Salk\_065040

E, pollen staining of Salk\_065040

F and G, callose staining of pollen mother cells and tetrads of Salk\_065040

H to K, the SEM observation of Salk\_065040 pollen grains

**Figure E**

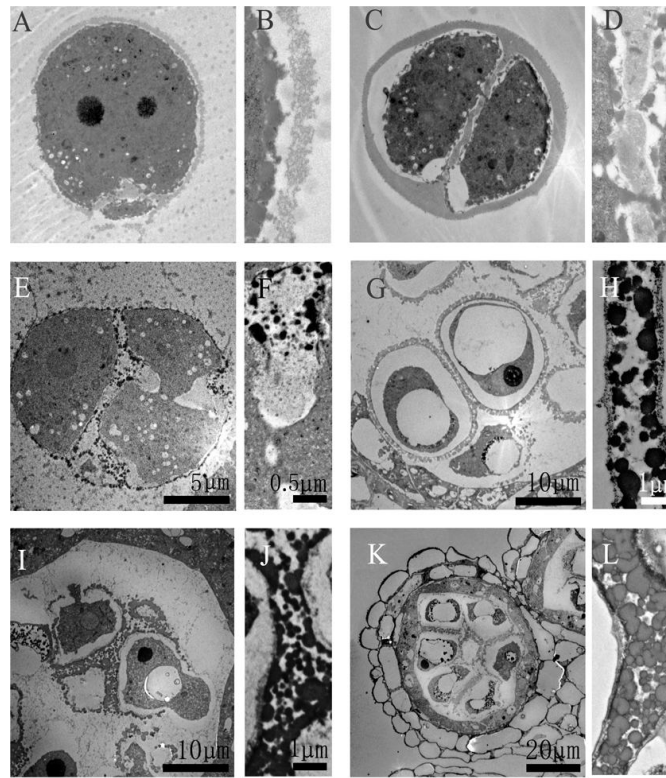

A and B, pollen mother cell

C to F, tetrads

G to I, adhered microspores

J to L, adhered microspores and abnormal sporopollenin deposition
